# Supplementary material for: Bile retinoids imprint intestinal CD103+ dendritic cells with the ability to generate gut-tropic T cells
Source: PubMed Central journal article supplement — Mucosal Immunol. 2011 Feb 2;4(4):438–47. doi: 10.1038/mi.2010.91 (PMC3130189; doi:10.1038/mi.2010.91), 2011-02-02
Supplement: mi201091x1.pdf [file mi201091x1.pdf]

SUPPLEMENTARY FIGURE 1

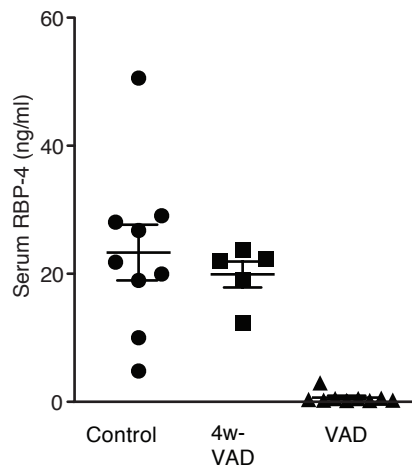

**Supplementary Figure 1.** Retinol binding protein (RBP)-4 levels in the serum of control, 4-week and long term-Vitamin A deficient (VAD) mice were assessed by ELISA as described in supplementary materials and methods. Each symbol represents RBP-4 levels from an individual mouse.

## SUPPLEMENTARY FIGURE 2

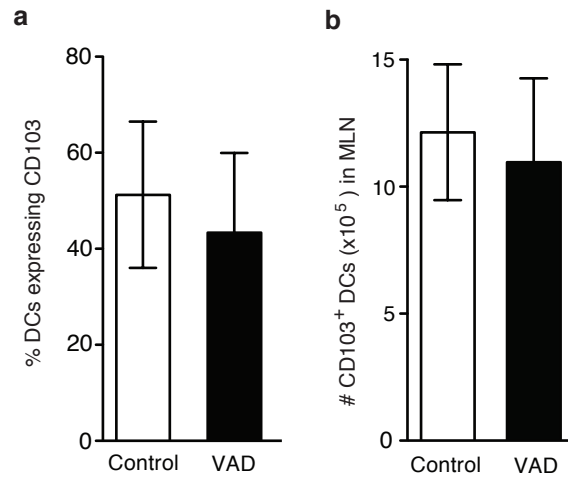

**Supplementary Figure 2.** Percentage **(a)** and total number **(b)** of CD103+ dendritic cells (DCs) in the mesenteric lymph node (MLN) of control and long term-Vitamin A deficient (VAD) mice was assessed by flow cytometry. **(a)** Mean (SD) of 5 independent experiments with 2-3 mice/experiment. **(b)** Mean (SD) 3 independent experiments with 2-3 mice/experiment.

SUPPLEMENTARY FIGURE 3

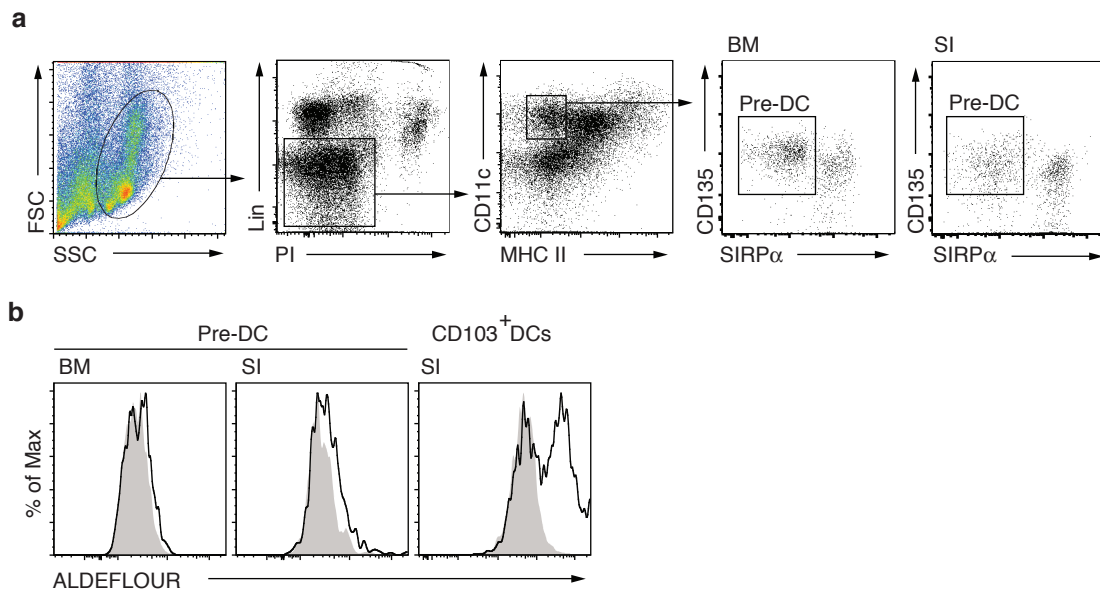

**Supplementary Figure 3.** Pre-dendritic cells (DCs) do not possess aldehyde dehydrogenase activity. **(a)** Gating strategy used to identify pre-DCs. CD11c<sup>+</sup> cells were purified from the bone marrow (BM) and small intestine by MACS and pre-DCs identified within this population by flow cytometry. Lin<sup>-</sup>; CD3, CD19, NK1.1, Ter-119, B220. **(b)** Aldehyde dehydrogenase activity in bone marrow (BM) and small intestinal lamina propria (SI-LP) pre-DCs and control SI-LP CD103<sup>+</sup>CD11b<sup>+</sup> DCs. Results are from 1 representative experiment of 2 performed using pooled cells from 2-3 mice/experiment.

SUPPLEMENTARY FIGURE 4

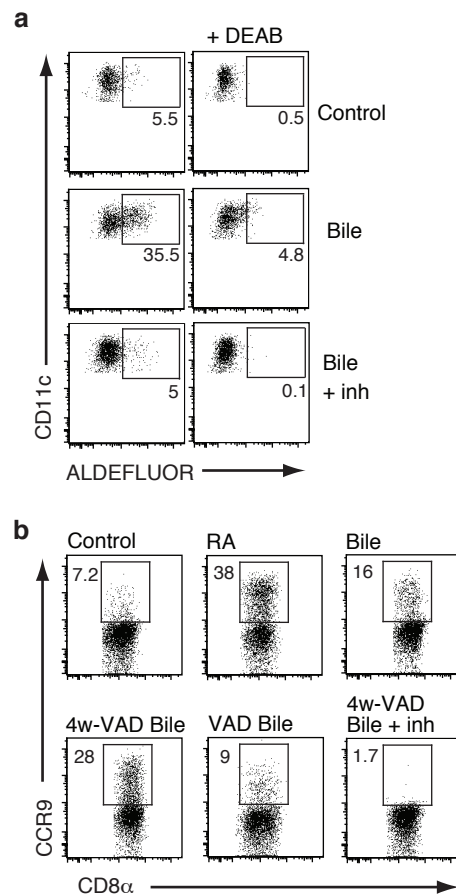

**Supplementary Figure 4.** (a) Representative FACS plots of aldefluor expression in bone marrow derived dendritic cells (BM-DCs) incubated with bile and/or LE540 (inh) (2  $\mu$ M) for 2d. Right sets of plots show ALDEFLUOR staining in the presence of the aldefluor dehydrogenase inhibitor diethylaminobenzaldehyde (DEAB). (b) Representative FACS plots of CC chemokine (CCR)9 expression on OT-I cells after incubation with antigen pulsed BM-DCs. BM-DCs were incubated with LE540 (2  $\mu$ M), retinoic acid (RA) (20 nM), bile, 4-week Vitamin A deficient (VAD) bile or VAD bile as indicated, for 2 d, pulsed with ovalbumin (OVA), washed and cultured together with OT-I cells. CCR9 expression on dividing OT-I cells was assessed 3.5 d later by flow cytometry.
